# Supplementary material for: A reference map of murine cardiac transcription factor chromatin occupancy identifies dynamic and conserved enhancers
Source: PubMed Central journal article supplement (PMC6817842; doi:10.1038/s41467-019-12812-3), 2019-10-28
Supplement: 41467_2019_12812_MOESM3_ESM.pdf [file 41467_2019_12812_MOESM3_ESM.pdf]

### **Description of Additional Supplementary Files**

File Name: Supplementary Data 1

Description: Tabbed excel workbook containing all the summit200 files.

File Name: Supplementary Data 2

Description: Tabbed excel workbook with GO analyses.

File Name: Supplementary Data 3

Description: Tabbed excel workbook with fetal and adult co-bound regions.

File Name: Supplementary Data 4

Description: Tabbed excel workbook of DEGs from this study.

File Name: Supplementary Data 5

Description: Tabbed excel workbook of TF-bound regions adjacent to DEGs found in Tead1-homozygous loss of function.
